# Supplementary material for: Fabrication of highly active phosphatase-like fluorescent cerium-doped carbon dots for in situ monitoring the hydrolysis of phosphate diesters
Source: Royal Society of Chemistry journal article supplement (doi:10.1039/d0ra07429b), 2020-01-01
Supplement: d0ra07429b1.pdf [file d0ra07429b1.pdf]

# **Fabrication of High-active Phosphatases-like Fluorescent Cerium-doped Carbon Dots for In-situ Monitoring Hydrolysis of Phosphate Diester**

Jinyan Du\*, Shuangqing Qi, Juan Chen, Ying Yang, Tingting Fan, Ping Zhang,  
Shujuan Zhuo, Changqing Zhu\*

Anhui Key Laboratory of Chemo-Biosensing, Key Laboratory of Functional Molecular Solids, Ministry of Education, College of Chemistry and Materials Science, Anhui Normal University, Wuhu, 241000, PR China.

\*Corresponding authors, E-mail addresses: [dujinyan@mail.ahnu.edu.cn](mailto:dujinyan@mail.ahnu.edu.cn) (J. Y. Du), [zhucq@mail.ahnu.edu.cn](mailto:zhucq@mail.ahnu.edu.cn) (C. Q. Zhu).

## **Degradation of pesticide**

### **1. Stock standard solutions**

Individual stock standard solution (ca.1000 mg/L) of pesticides was prepared by dissolving 25 mg chlorpyrifos in 25 mL of acetone. All standard solutions were stored in glass-stoppered flasks at 4°C.

### **2. Pretreatment**

In a typical experiment, 1.0 ml stock solution of chlorpyrifos and 1.0 ml CeCDs were introduced into a colorimetric tube. At 25 °C and pH 8.8, the reaction liquid was shaken for 48 h, then processed according to the GB/T 5009. 145-2003 for determination of chlorpyrifos degradation through GC-MS.

The former sample pretreatment: 3 mL mixture was taken after biodegradation reaction, and extracted by adding 10 mL ethyl acetate. Therein 5 ml of the organic phase was blown dry by N<sub>2</sub>, then dissolved in 1mL trichloromethane followed by filtering through 0.22 μm organic membrane. Finally, the degradation rate was measured by GC-MS, using chlorpyrifos as internal standard.

### **3. GC-MS analysis**

The degradation of chlorpyrifos was analyzed by GC-MS. The chromatographic settings were: the injector was in a splitless mode; the injection port was at 260°C; sample volume was 1 μL; the carrier gas was helium at a pressure of 53.5 kPa and a flow-rate of 1.00 mL·min<sup>-1</sup>. The furnace temperature for chlorpyrifos solutions was initially at 40°C for 1 min and then increased at a rate of 10°C min<sup>-1</sup> to 180°C, followed by 2 min stabilization, then increased at a rate of 30°C min<sup>-1</sup> to 290°C,

followed by 5 min stabilization. The mass spectrometer conditions were: ion source temperature was 300°C; interface temperature was 250°C; detector gain was in an absolute mode; detector voltage was at 1.0 kV; acquisition was in a SIM mode; scan interval was 0.2s; solvent cut was 3min. GC-MS solution software (release version 2.30) was used to identify and process the data.

**Fig. S1** (A) TEM images of Ce-free bare CDs. (B) Size distribution of Ce-free bare CDs analyzed from multiple images.

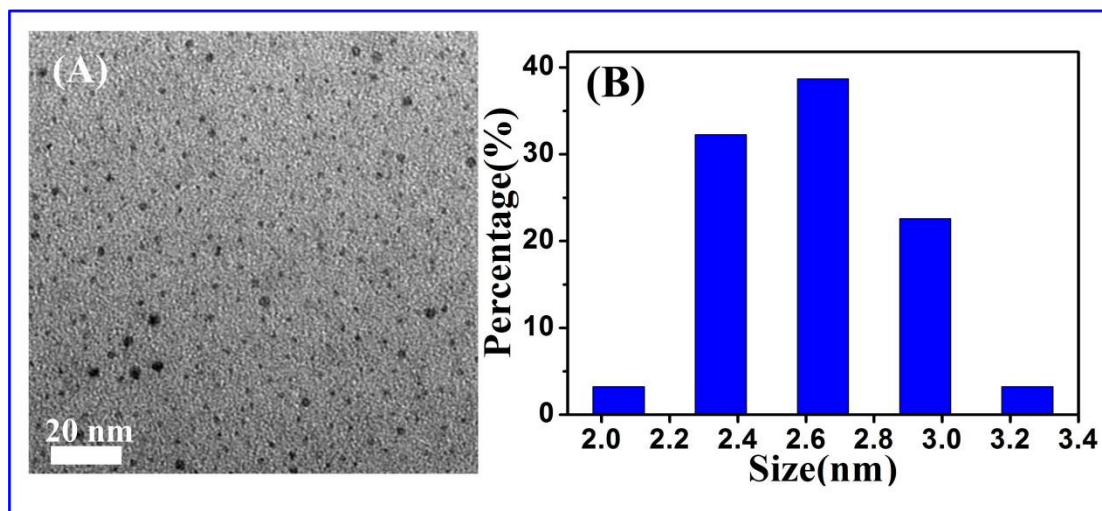

**Fig. S2** (A) The absorption and (B) Fluorescence emission spectra of the Ce-free bare CDs.

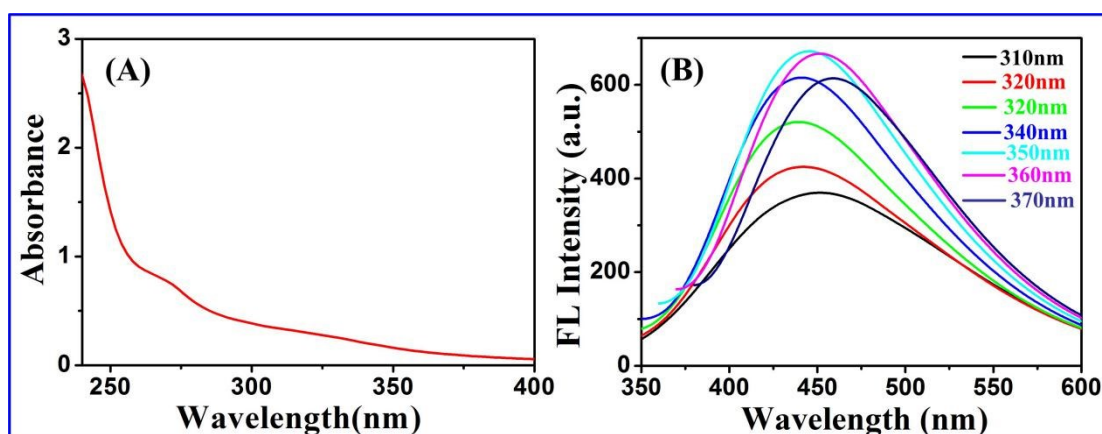

**Fig. S3** EDS spectrum of the CeCDs.

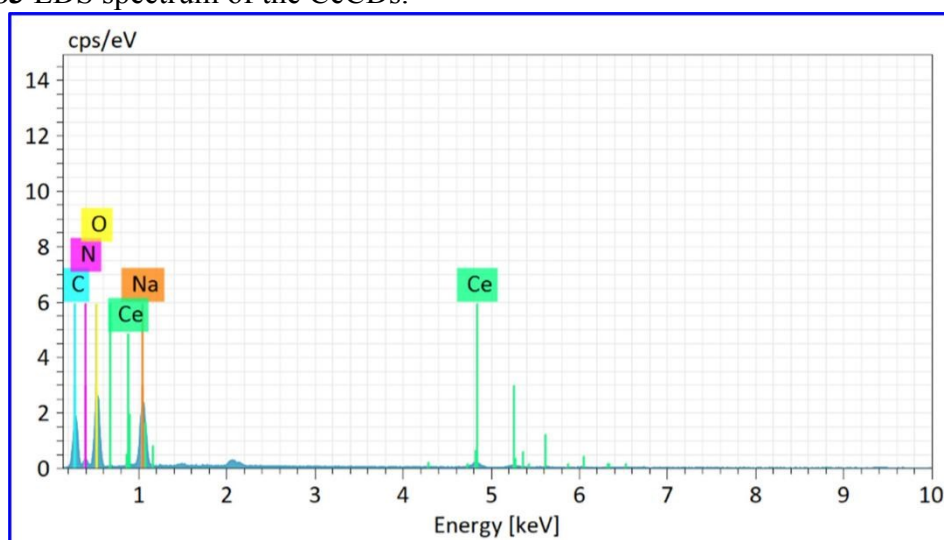

**Fig. S4** Dependency of catalytic activity of CeCDs on synthetic conditions: (A) ratio of EDTA to cerium nitrate, (B) reaction temperature, (C) reaction time.

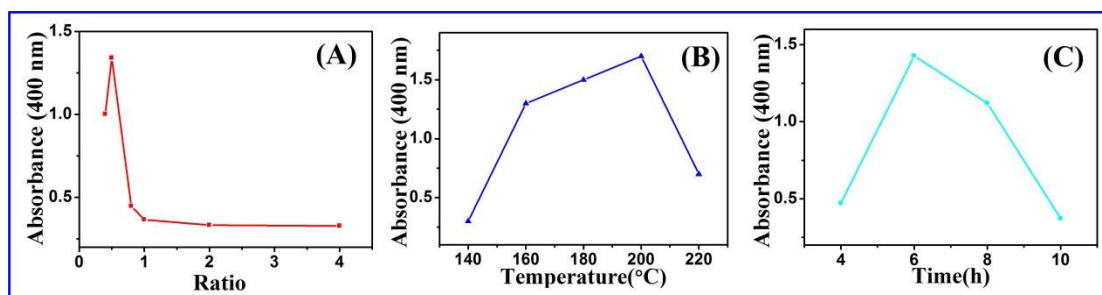

**Fig. S5** The pH-dependent absorbance changes at 400 nm during the assay for phosphatase activity of the CeCDs.

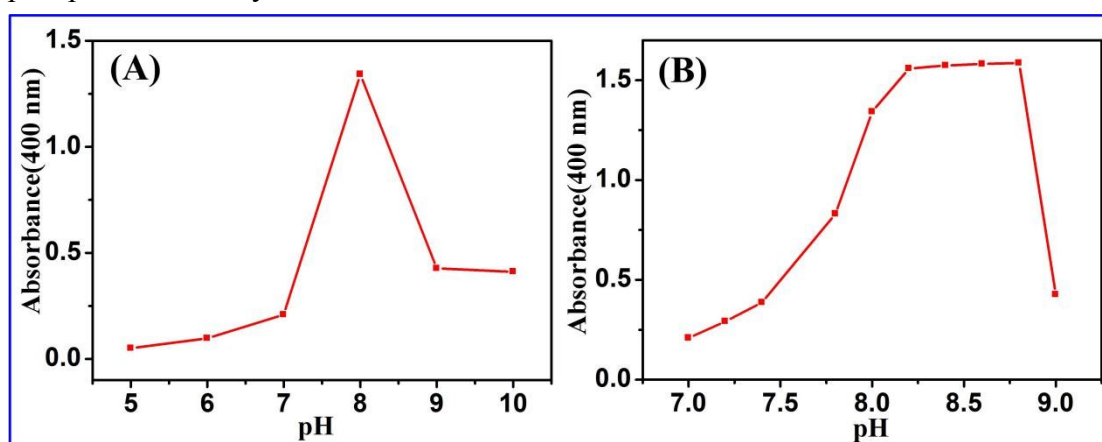

**Fig. S6** (A) Time-dependent UV-vis spectral changes in catalytic hydrolysis of BNPP by free - Ce bare CDs. (B) Plot of absorbance at 400 nm versus time.

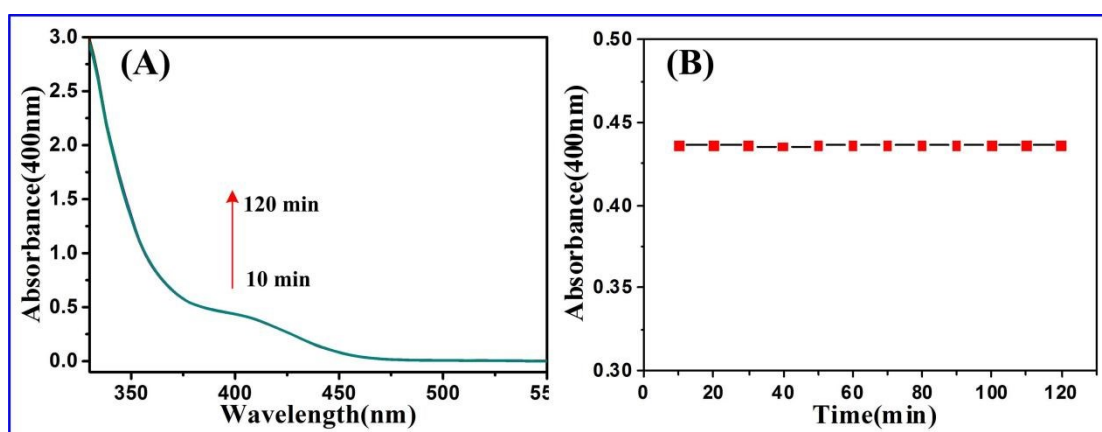

**Fig. S7** (A) Time-dependent UV-vis spectral changes in the hydrolysis of BNPP catalyzed by the CeCDs under dark conditions. (B) Plots of  $\log[A_{\infty}/(A_{\infty}-A_t)]$  versus time.

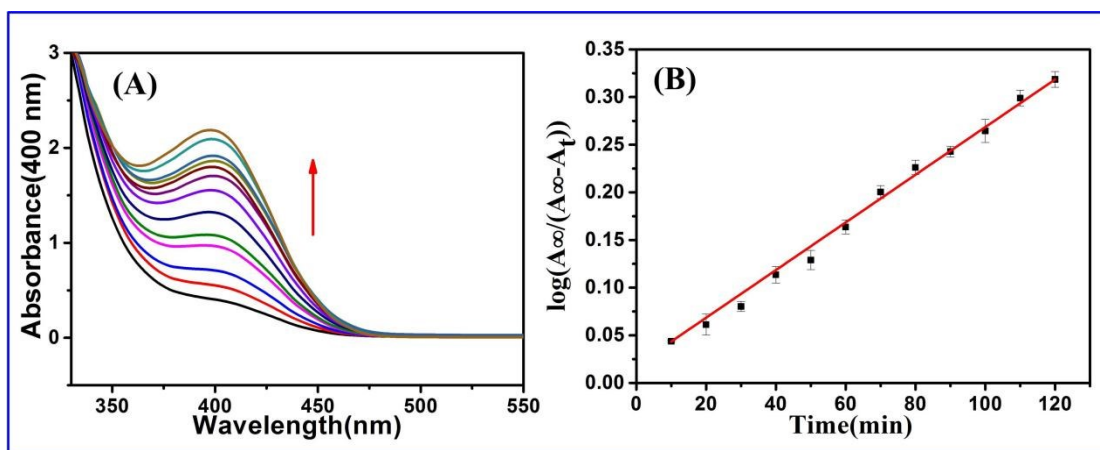

**Fig. S8** (A) Time-dependent UV-vis spectral changes in BNPP solution catalyzed by CeCDs upon addition of potassium persulfate. The spectra were recorded at intervals of 10 min. (B) Plots of  $\log[A_{\infty}/(A_{\infty}-A_t)]$  versus time  $t$  for the catalytic hydrolytic cleavage of BNPP in the presence of electron scavenging agent (potassium persulfate).

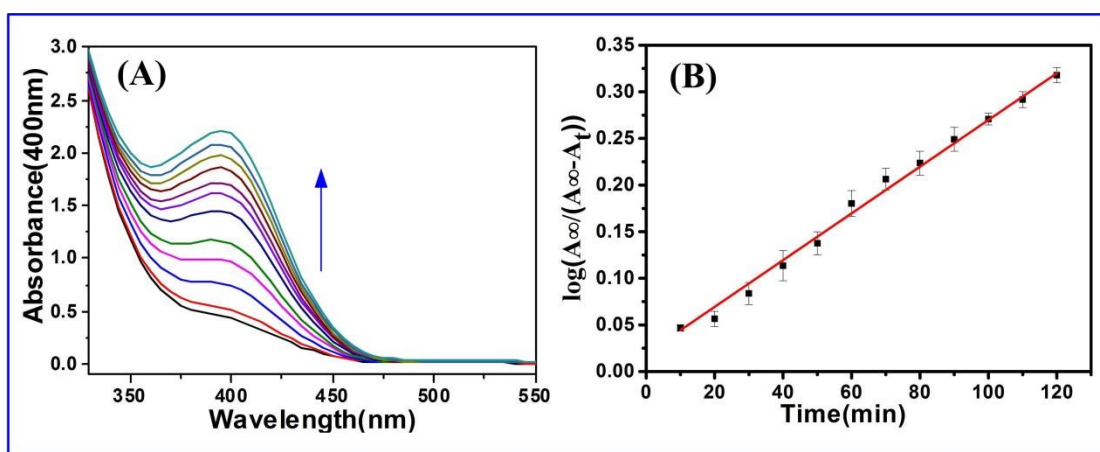

**Fig. S9** Fluorescence spectra of the CeCDs with increasing amounts of BNPP at pH 8.5.

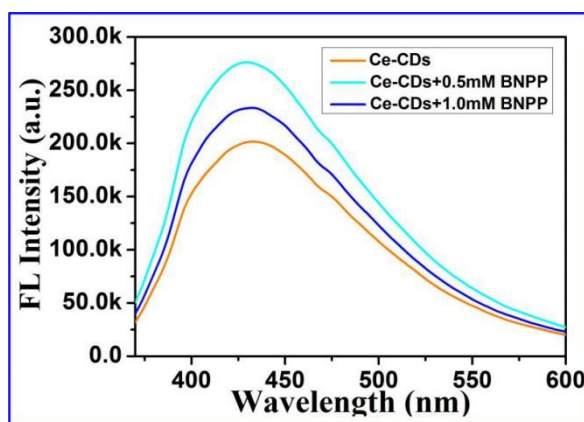

**Fig. S10** (A) Chromatographic profiles of a standard solution of phosphate. (B) Chromatographic profiles of phosphate ion (the hydrolysis product of chlorpyrifos)

catalyzed by the CeCDs).

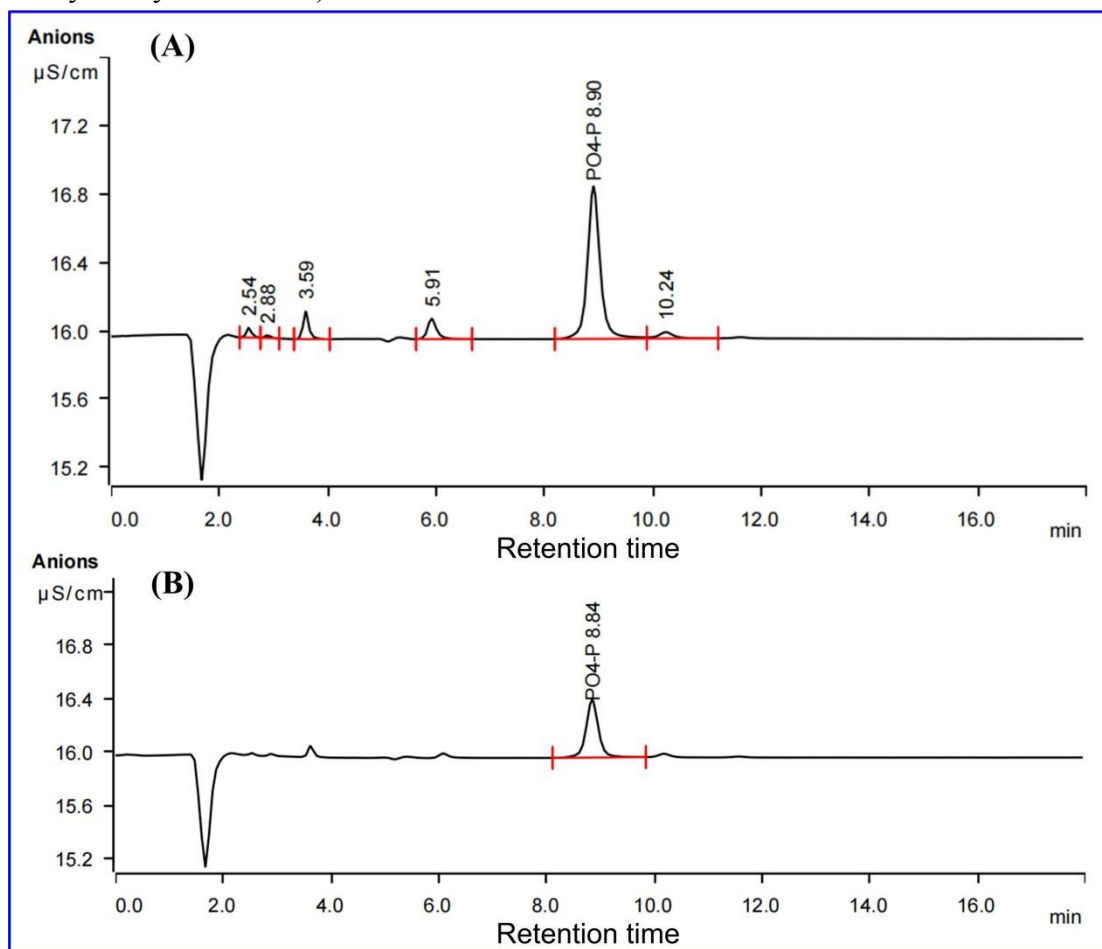

**Fig. S11** Kinetic plot of (A)  $v$  vs  $S$  (B)  $1/v$  vs  $1/S$  for phosphatase activity where  $v$  = initial rate and  $[S] = [BNPP]$ .

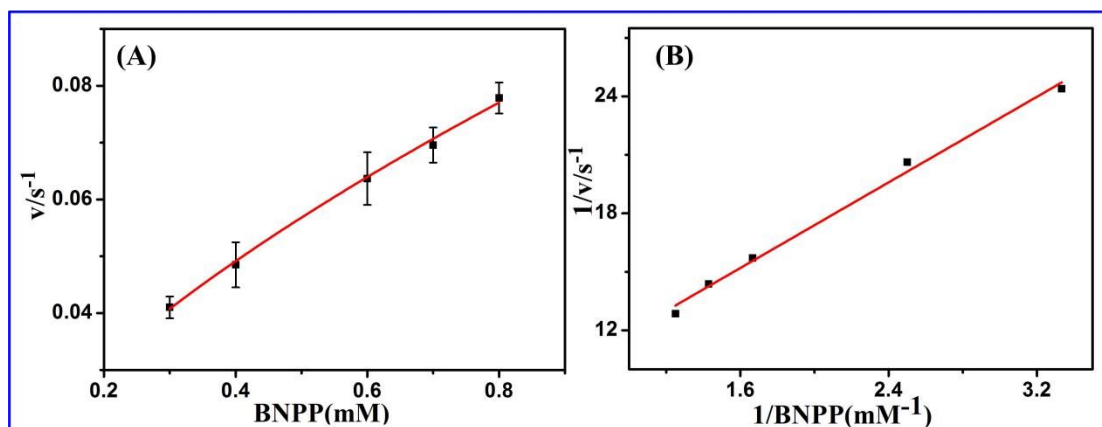

**Fig. S12** (a) UV-vis absorption spectrum of p-nitrophenol, (b) Fluorescence emission spectrum of the CeCDs ( $\lambda_{ex} = 350$  nm).

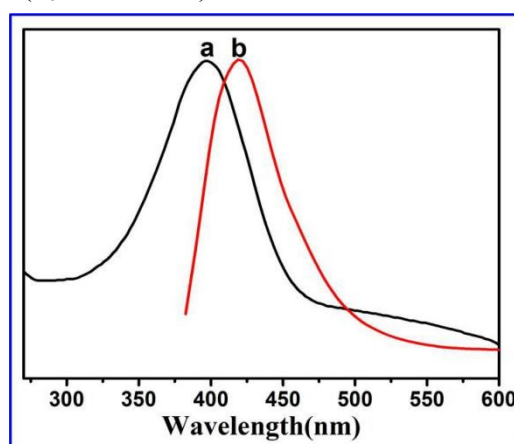

**Fig. S13** Fluorescence decay profiles for the CeCDs in the absence and presence of BNPP.

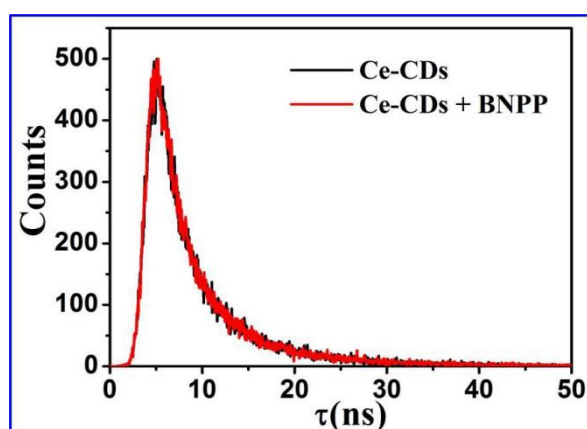



**Fig. S14** Time-dependent GC-MS chromatogram of chlorpyrifos sample catalyzed by Ce-free bare CDs. Retention time: 19.91 min.

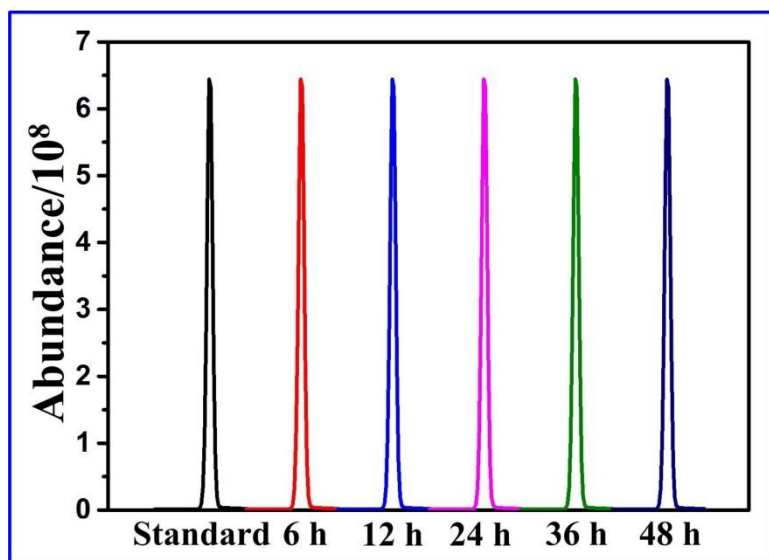

**Table S1** Comparison of kinetic parameters for the catalytic hydrolytic cleavage of BNPP.

| Catalyst                                                                                                     | Vmax(M/s)              | Km(M)                 | K(min <sup>-1</sup> ) | Refs.     |
|--------------------------------------------------------------------------------------------------------------|------------------------|-----------------------|-----------------------|-----------|
| [Fe <sub>4</sub> (cpdp) <sub>2</sub> (phth) <sub>2</sub> (OH) <sub>2</sub> ] <sub>2</sub> ·8H <sub>2</sub> O | 6.83×10 <sup>-9</sup>  | 4.80×10 <sup>-3</sup> | 1.64×10 <sup>-3</sup> | [1]       |
| [Fe <sub>4</sub> (cpdp) <sub>2</sub> (terephth) <sub>2</sub> (OH) <sub>2</sub> ]                             | 2.66×10 <sup>-9</sup>  | 4.08×10 <sup>-3</sup> | 6.03×10 <sup>-4</sup> | [1]       |
| [Zn <sub>4</sub> (Hcpdp) <sub>2</sub> (suc)]Br <sub>2</sub> ·12H <sub>2</sub> O                              | 7.64×10 <sup>-10</sup> | 7.60×10 <sup>-3</sup> | 1.83×10 <sup>-4</sup> | [1]       |
| [Zn(L <sup>1</sup> )Cl <sub>2</sub> ](ClO <sub>4</sub> ) <sub>2</sub> ·H <sub>2</sub> O                      | 7.09×10 <sup>-9</sup>  | 2.08×10 <sup>-3</sup> | 8.52×10 <sup>-3</sup> | [2]       |
| [Zn(L <sup>2</sup> )Cl <sub>2</sub> ](ClO <sub>4</sub> ) <sub>2</sub> ·2H <sub>2</sub> O                     | 1.83×10 <sup>-8</sup>  | 6.99×10 <sup>-4</sup> | 2.20×10 <sup>-2</sup> | [2]       |
| [Zn(bpy)Cl <sub>2</sub> ]·2H <sub>2</sub> O                                                                  | 2.37×10 <sup>-10</sup> | 6.82×10 <sup>-3</sup> | 3.28×10 <sup>-5</sup> | [2]       |
| [Cu(tacn)(OH <sub>2</sub> ) <sub>2</sub> ] <sup>2+</sup>                                                     | /                      | /                     | 1.50×10 <sup>-5</sup> | [3]       |
| Co <sub>2</sub> L                                                                                            | 4.62×10 <sup>-4</sup>  | 9.30×10 <sup>-4</sup> | /                     | [4]       |
| [Ni <sub>2</sub> L(μ-OH)](ClO <sub>4</sub> ) <sub>2</sub>                                                    | /                      | /                     | 8.94×10 <sup>-3</sup> | [5]       |
| [Fe <sup>II</sup> <sub>2</sub> LCl <sub>3</sub> ]·3H <sub>2</sub> O                                          | 3.10×10 <sup>-9</sup>  | 3.10×10 <sup>-3</sup> | 3.12×10 <sup>-3</sup> | [6]       |
| [Zn <sup>II</sup> <sub>2</sub> (L <sub>2H</sub> )(AcO)(H <sub>2</sub> O)][Zn <sup>II</sup> <sub>2</sub> L']  | /                      | 6.15×10 <sup>-2</sup> | 2.76×10 <sup>-4</sup> | [7]       |
| [Zn <sup>II</sup> <sub>2</sub> (HL <sup>1</sup> )(CH <sub>3</sub> COO)] <sup>+</sup>                         | 4.37×10 <sup>-11</sup> | 1.96×10 <sup>-3</sup> | 7.56×10 <sup>-5</sup> | [8]       |
| CeCDs                                                                                                        | 1.58×10 <sup>-4</sup>  | 8.66×10 <sup>-4</sup> | 2.00×10 <sup>-3</sup> | This work |

**Table S2** Degradation efficiency of chloryrifos catalyzed by the CeCDs.

| <b>Degradation time</b> | <b>Degradation percentage</b> |
|-------------------------|-------------------------------|
| 6h                      | 4.10%                         |
| 12h                     | 20.10%                        |
| 24h                     | 41.85%                        |
| 36h                     | 61.05%                        |
| 48h                     | 74.50%                        |

## References

1. Yan, F.; Zu, F.; Xu, J.; Zhou, X.; Bai, Z.; Ma, C.; Luo, Y.; Chen, L., Fluorescent carbon dots for ratiometric detection of curcumin and ferric ion based on inner filter effect, cell imaging and PVDF membrane fouling research of iron flocculants in wastewater treatment. *Sensors and Actuators B: Chemical* **2019**, *287*, 231-240.
2. He, J.; Sun, J.; Mao, Z.-W.; Ji, L.-N.; Sun, H., Phosphodiester hydrolysis and specific DNA binding and cleavage promoted by guanidinium-functionalized zinc complexes. *Journal of inorganic biochemistry* **2009**, *103*, 851-858.
3. Fry, F. H.; Fischmann, A. J.; Belousoff, M. J.; Spiccia, L.; Brügger, J., Kinetics and mechanism of hydrolysis of a model phosphate diester by [Cu (Me3tacn)(OH)<sub>2</sub>]<sup>2+</sup> (Me3tacn= 1, 4, 7-trimethyl-1, 4, 7-triazacyclononane). *Inorganic chemistry* **2005**, *44*, 941-950.
4. Zhao, M.; Xue, S.-S.; Jiang, X.-Q.; Zheng, L.; Ji, L.-N.; Mao, Z.-W., Phosphate ester hydrolysis catalyzed by a dinuclear cobalt (II) complex equipped with intramolecular β-cyclodextrins. *Journal of Molecular Catalysis A: Chemical* **2015**, *396*, 346-352.
5. Sanyal, R.; Zhang, X.; Chakraborty, P.; Giri, S.; Chattopadhyay, S. K.; Zhao, C.; Das, D., Role of solvent in the phosphatase activity of a dinuclear nickel (II) complex of a Schiff base ligand: mechanistic interpretation by DFT studies. *New Journal of Chemistry* **2016**, *40*, 7388-7398.
6. Chen, X. Q.; Peng, X. J.; Wang, J. Y.; Wang, Y.; Wu, S.; Zhang, L. Z.; Wu, T.; Wu, Y. K., Efficient increase of DNA cleavage activity of a diiron (III) complex by a conjugating acridine group. *European Journal of Inorganic Chemistry* **2007**, *2007*, 5400-5407.
7. Chen, J.; Wang, X.; Zhu, Y.; Lin, J.; Yang, X.; Li, Y.; Lu, Y.; Guo, Z., An asymmetric dizinc phosphodiesterase model with phenolate and carboxylate bridges. *Inorganic chemistry* **2005**, *44*, 3422-3430.
8. Buchholz, R. R.; Etienne, M. E.; Dorgelo, A.; Mirams, R. E.; Smith, S. J.; Chow, S. Y.; Hanton, L. R.; Jameson, G. B.; Schenk, G.; Gahan, L. R., A structural and catalytic model for zinc phosphoesterases. *Dalton Transactions* **2008**, 6045-6054.
